# Supplementary material for: Self-adhesion of uncrosslinked poly(butadiene-co-acrylonitrile), i.e. nitrile rubber, an inhomogeneous and associative polymer
Source: Royal Society of Chemistry journal article supplement (doi:10.1039/d3sm01630g), 2024-01-01
Supplement: d3sm01630g1.pdf [file d3sm01630g1.pdf]

## **Electronic Supplementary Information: Self-Adhesion of Poly(butadiene-co-acrylonitrile), *i.e.*, Nitrile Rubber, an Inhomogeneous and Associative Polymer**

Valentine Hervio,<sup>a</sup> Annie Brûlet,<sup>b</sup> Costantino Creton,<sup>a</sup> and Gabriel E. Sanoja<sup>a,\*</sup>

<sup>a</sup>*Laboratoire Sciences et Ingénierie de la Matière Molle, ESPCI Paris, Université PSL, CNRS UMR 7615, Sorbonne Université, 75005, Paris, France.*

<sup>b</sup>*Laboratoire Léon Brillouin, UMR 12 CEA-CNRS, Université Paris Saclay, 91191, Gif-sur-Yvette, France.*

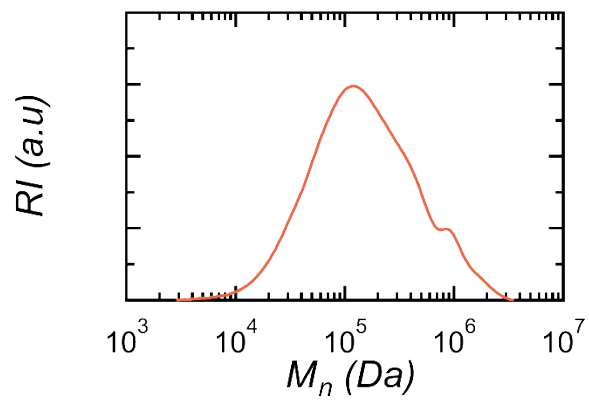

Figure S1. GPC trace reveals a weight-average molecular weight,  $M_w$ , of 127 kDa, and a dispersity index,  $\mathfrak{D}$ , of 2

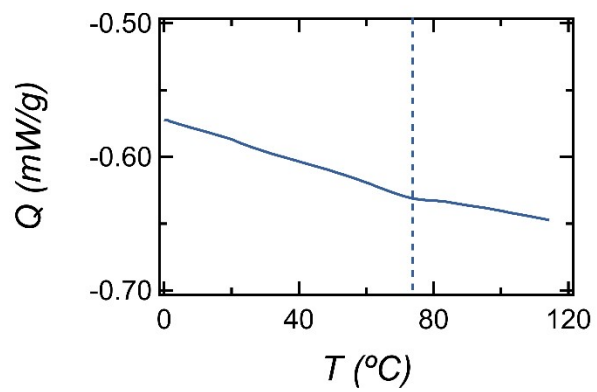

**Figure S2. Thermogram of NBR.** The glass transition temperature of the poly(acrylonitrile-alt-butadiene) domains is  $T_g \approx 75$  °C as indicated by the dashed line.

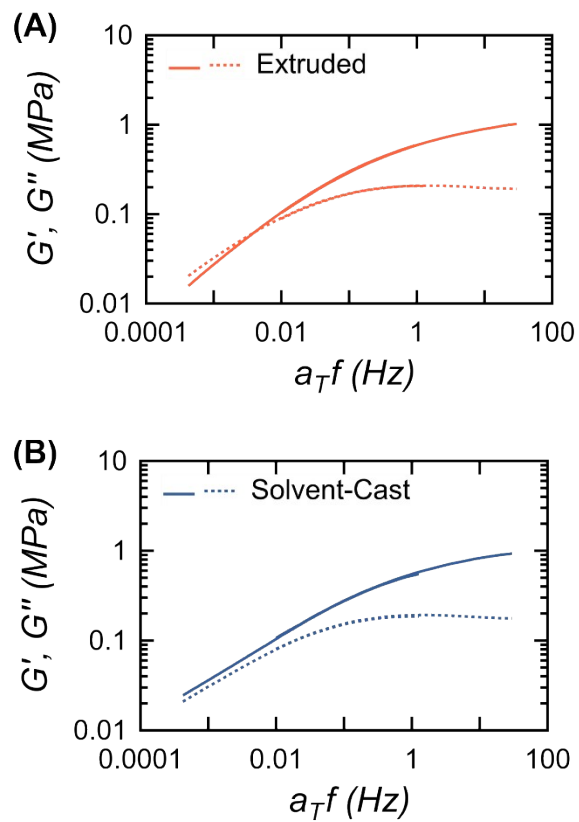

**Figure S3. Storage  $G'$  and loss  $G''$  moduli of (A) extruded and (B) solvent-cast NBR.** Processing NBR by extrusion (or heat-pressing) leads to a crossover of  $G'$  and  $G''$  at a lower reduced frequency,  $a_T f$ , and a shorter relaxation time. Adapted from Hervio *et al.*<sup>1</sup>

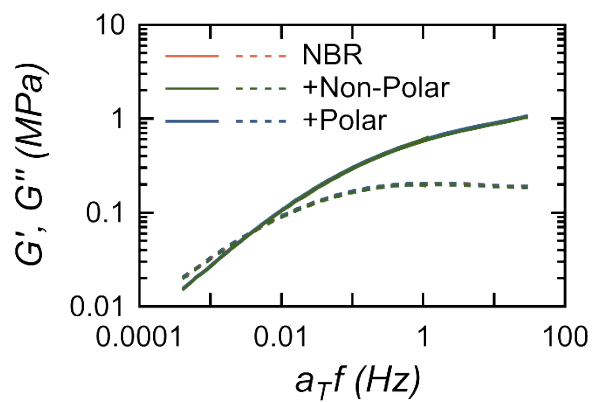

Figure S4. Storage  $G'$  and loss  $G''$  moduli of NBR (orange) with non-polar (green) and polar (blue) tackifier. The linear viscoelastic properties remain unaffected by the presence of tackifiers at 3 wt%.

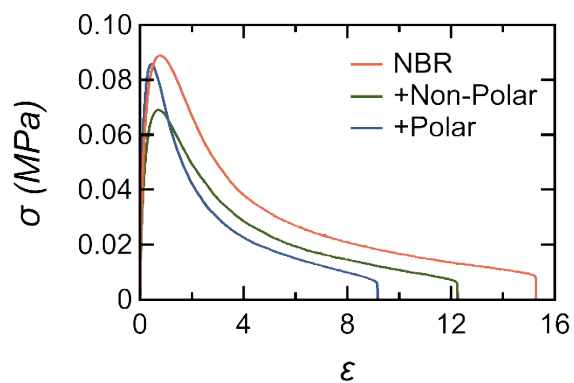

Figure S5. Stress-strain curves of NBR (orange) with non-polar (green) and polar (blue) tackifier.

Table S1. Estimate of the diffusion timescale,  $t_d \sim h_0^2/D$ , of organic solvents in NBR.

| Solvent         | $D \times 10^7$ (cm <sup>2</sup> /s) | Reference                                     | $t_d$ (h) |
|-----------------|--------------------------------------|-----------------------------------------------|-----------|
| MEK             | 6.07                                 | Aminabhavi, T. M.; <i>et al.</i> <sup>2</sup> | 1.1       |
| Acetone         | 6.31                                 | Aminabhavi, T. M.; <i>et al.</i> <sup>2</sup> | 1.1       |
| Ethyl acetate   | 3.45                                 | Khinnavar, R. S.; <i>et al.</i> <sup>3</sup>  | 2.0       |
| Toluene         | 4.1                                  | Harogoppad, S. B.; <i>et al.</i> <sup>4</sup> | 1.4       |
| Dichloromethane | 19.61                                | Khinnavar, R. S.; <i>et al.</i> <sup>5</sup>  | 0.4       |
| Chloroform      | 11.45                                | Khinnavar, R. S.; <i>et al.</i> <sup>5</sup>  | 0.6       |
| Tetrahydrofuran | 5.57                                 | Khinnavar, R. S.; <i>et al.</i> <sup>5</sup>  | 1.2       |
| Isopropanol     | 0.11                                 | Aminabhavi, T. M.; <i>et al.</i> <sup>6</sup> | 63.1      |
| Methanol        | 1.1                                  | Aminabhavi, T. M.; <i>et al.</i> <sup>6</sup> | 6.3       |
| Pentane         | → 0                                  | Harogoppad, S. B.; <i>et al.</i> <sup>7</sup> | → ∞       |

Table S2. Estimate of the evaporation timescale,  $t_e \sim R^2 \phi \rho_l / 4D\rho_s$ , of organic solvents in NBR

| Solvent         | $\phi$ | $\rho_l$ (kg/m <sup>3</sup> ) | $\rho_s$ (kg/m <sup>3</sup> ) | $D \times 10^7$ (cm <sup>2</sup> /s) | Reference                                     | $t_e$ (h) |
|-----------------|--------|-------------------------------|-------------------------------|--------------------------------------|-----------------------------------------------|-----------|
| MEK             | 0.8    | 805                           | 0.13                          | 6.07                                 | Aminabhavi, T. M.; <i>et al.</i> <sup>2</sup> | 118       |
| Acetone         | 0.7    | 784                           | 0.38                          | 6.31                                 | Aminabhavi, T. M.; <i>et al.</i> <sup>2</sup> | 33        |
| Ethyl acetate   | 0.7    | 902                           | 0.18                          | 3.45                                 | Khinnavar, R. S.; <i>et al.</i> <sup>3</sup>  | 148       |
| Toluene         | 0.7    | 867                           | 0.05                          | 4.1                                  | Harogopad, S. B.; <i>et al.</i> <sup>4</sup>  | 401       |
| Dichloromethane | 0.9    | 1330                          | 0.74                          | 19.61                                | Khinnavar, R. S.; <i>et al.</i> <sup>5</sup>  | 12        |
| Chloroform      | 0.9    | 1490                          | 0.33                          | 11.45                                | Khinnavar, R. S.; <i>et al.</i> <sup>5</sup>  | 50        |
| Tetrahydrofuran | 0.8    | 889                           | 0.22                          | 5.57                                 | Khinnavar, R. S.; <i>et al.</i> <sup>5</sup>  | 88        |
| Isopropanol     | 0.2    | 786                           | 0.06                          | 0.11                                 | Aminabhavi, T. M.; <i>et al.</i> <sup>6</sup> | 3880      |
| Methanol        | 0.2    | 792                           | 0.22                          | 1.1                                  | Aminabhavi, T. M.; <i>et al.</i> <sup>6</sup> | 81        |
| Pentane         | 0.2    | 626                           | 0.74                          | → 0                                  | Harogopad, S. B.; <i>et al.</i> <sup>7</sup>  | → ∞       |

## References

- 1 V. Hervio, B. Bresson, A. Brûlet, I. J. Paredes, A. Sahu, V. Briand, C. Creton and G. E. Sanoja, *Macromolecules*, 2021, **54**, 2828–2834.
- 2 T. M. Aminabhavi and R. S. Munnolli, *Polym. Int.*, 1993, **32**, 61–70.
- 3 R. S. Khinnavar and T. M. Aminabhavi, *J. Appl. Polym. Sci.*, 1992, **46**, 909–920.
- 4 S. B. Harogopad and T. M. Aminabhavi, *Polymer (Guildf.)*, 1991, **32**, 870–876.
- 5 R. S. Khinnavar and T. M. Aminabhavi, *J. Appl. Polym. Sci.*, 1992, **45**, 1107–1125.
- 6 T. M. Aminabhavi and R. S. Khinnavar, *Polymer (Guildf.)*, 1993, **34**, 1006–1018.
- 7 S. B. Harogopad and T. M. Aminabhavi, *J. Appl. Polym. Sci.*, 1991, **42**, 2329–2336.
